# Supplementary material for: Characterization of the Thermostable Biosurfactant Produced by Burkholderia thailandensis DSM 13276
Source: MDPI journal article supplement (doi:10.3390/polym14102088), 2022-05-20
Supplement: s1 [file s1]

## Supplemental Information

### Characterization of the Thermostable Biosurfactant Produced by *Burkholderia thailandensis* DSM 13276

Cátia Gil <sup>1,2</sup>, Ana Teresa Rebocho <sup>1,2</sup>, Asiyah Esmail <sup>1,2</sup>, Chantal Sevrin <sup>3</sup>, Christian Grandfils <sup>3</sup>, Cristiana A. V. Torres <sup>1,2</sup>, Maria A. M. Reis <sup>1,2</sup>, Filomena Freitas <sup>1,2</sup>

<sup>1</sup> Laboratory i4HB—Institute for Health and Bioeconomy, School of Science and Technology, NOVA University Lisbon, Caparica, Portugal

<sup>2</sup> UCIBIO—Applied Molecular Biosciences Unit, Department of Chemistry, School of Science and Technology, NOVA University Lisbon, Caparica, Portugal

<sup>3</sup> CEIB—Interfaculty Research Centre of Biomaterials, University of Liège, Liège, Belgium

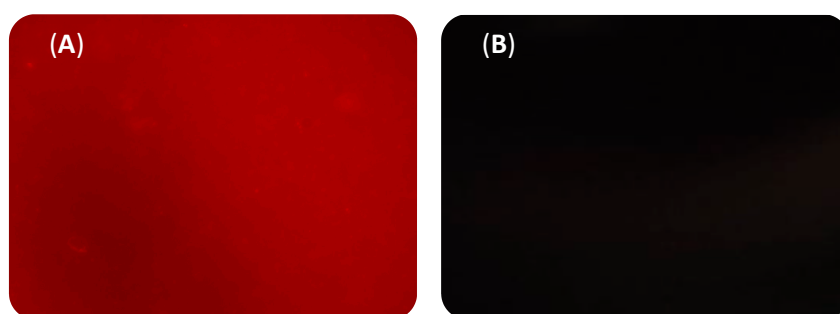

**Figure S1.** Fluorescence micrographs of (A) the biosurfactant solution (10 g/L) and (B) distilled water stained with the cationic dye Nile blue at 1000x magnification.

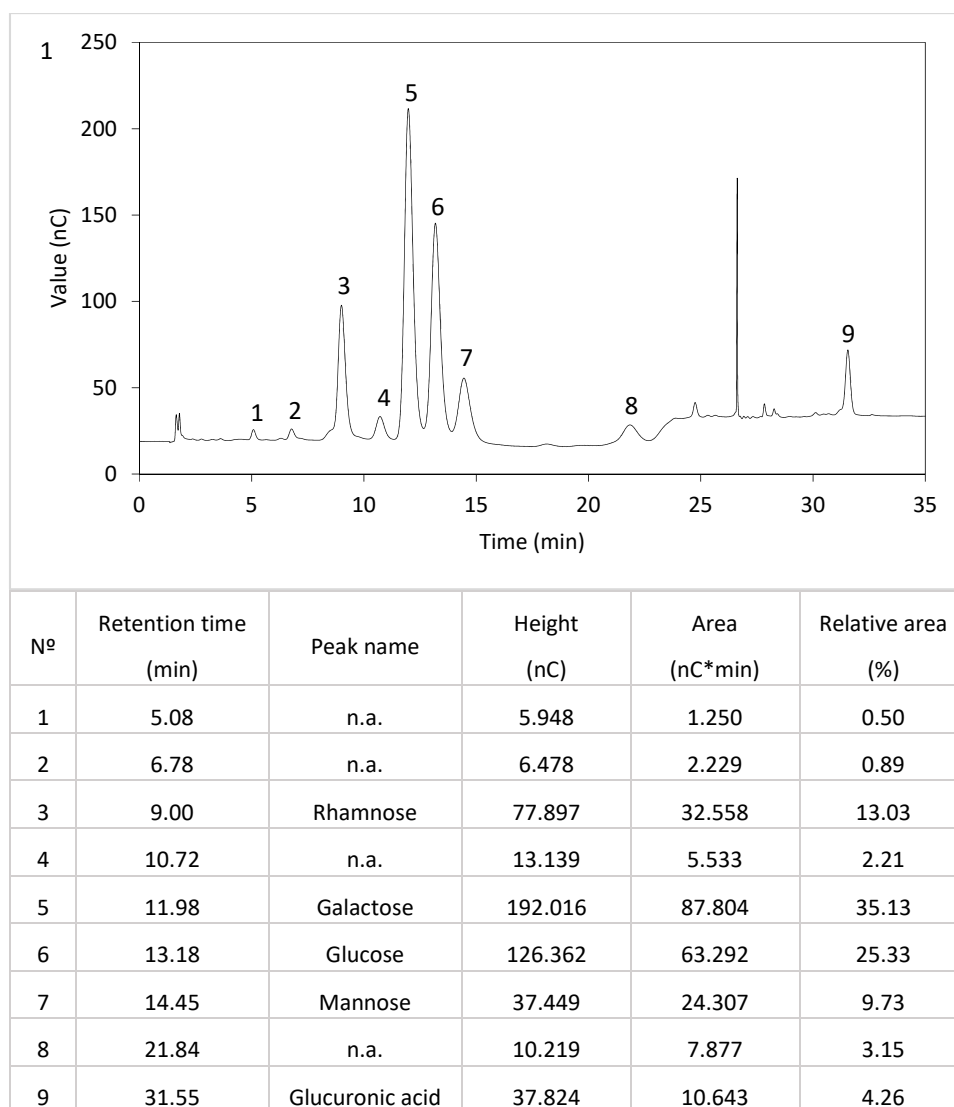

**Figure S2.** Example chromatogram and data for the HPLC analysis of the biosurfactant hydrolysate.

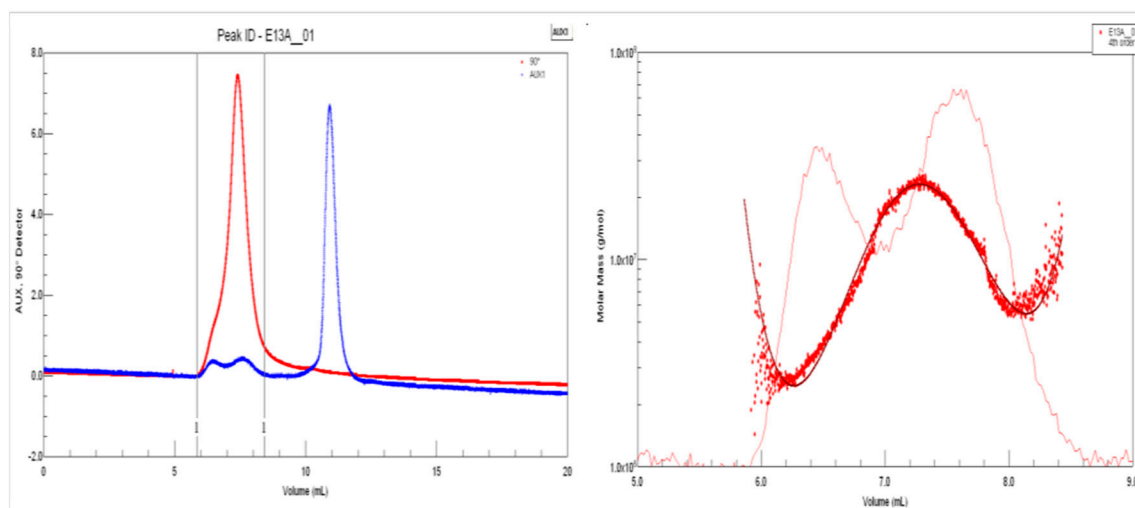

| Batch | Mn        | Mw        | Mz        | IP   |
|-------|-----------|-----------|-----------|------|
| R5    | 6.927e+06 | 1.150e+07 | 1.578e+07 | 1.66 |

**Figure S3.** Example data for the SEC-MALS analysis of the biosurfactant.

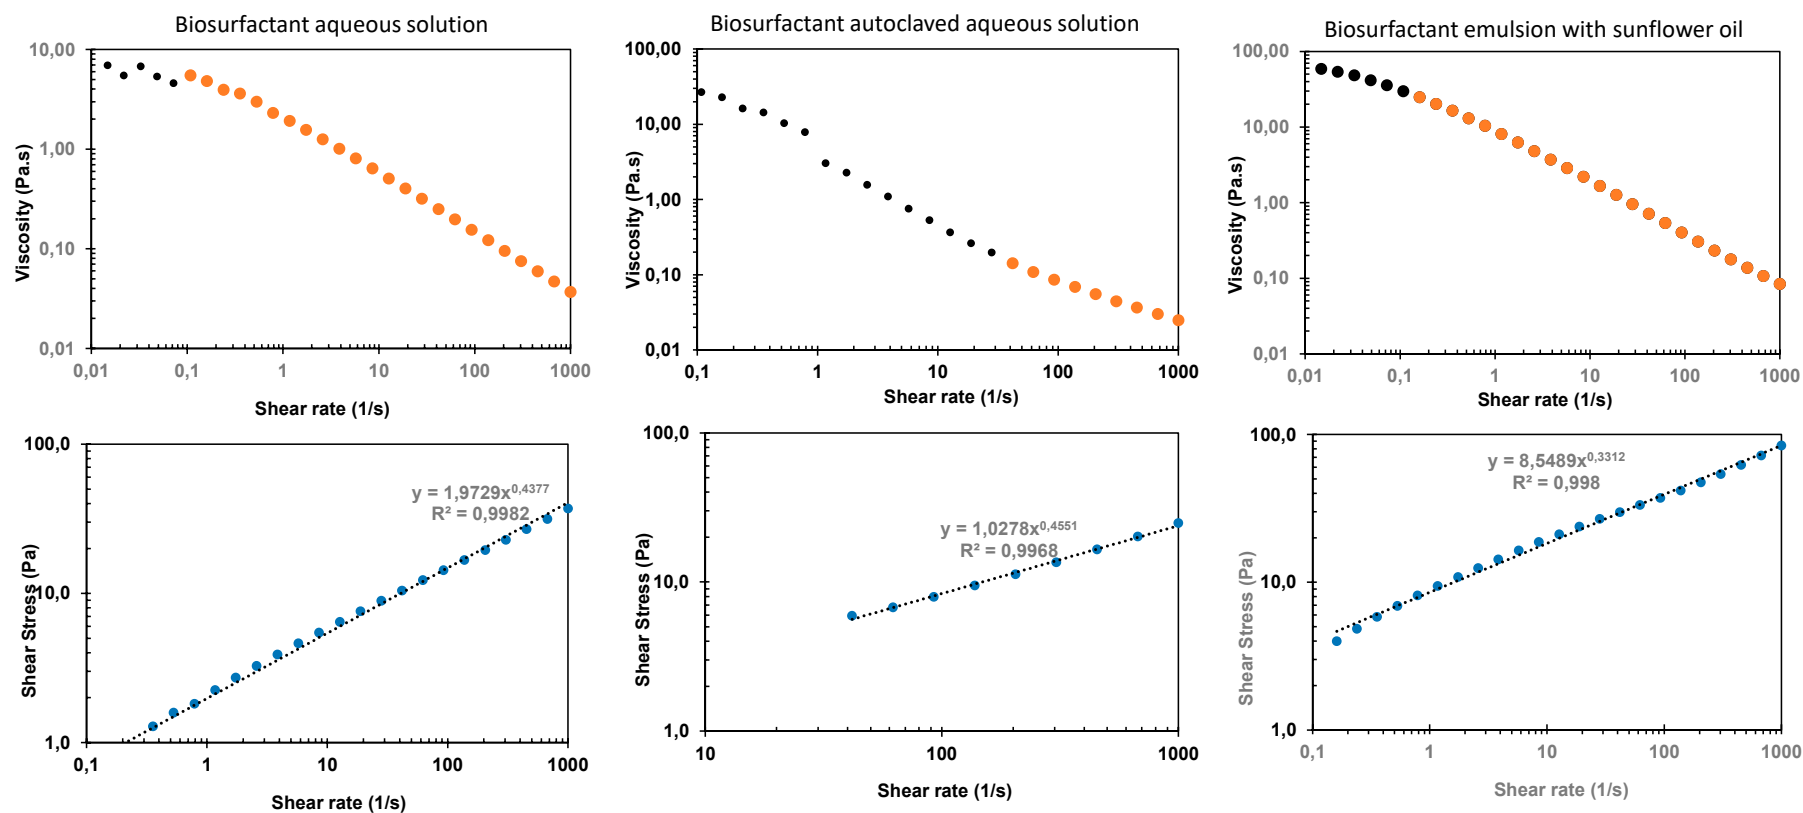

Legend: (●) region used for fitting; (●) experimental data; (...) fitting model

**Figure S4.** Data fitting with the power law model for the biosurfactant aqueous solution and for the autoclaved biosurfactant solution.
